# Supplementary material for: Boride-mediated and carbon nanotube-scaffolded synthesis of cobalt-based electrocatalyst for efficient and stable alkaline hydrogen evolution at industrial-scale current density
Source: Royal Society of Chemistry journal article supplement (doi:10.1039/d4qi03298e), 2025-01-01
Supplement: d4qi03298e1.pdf [file d4qi03298e1.pdf]

## Boride-mediated and carbon nanotubes-scaffolded synthesis of cobalt-based electrocatalyst for efficient and stable alkaline hydrogen evolution at industrial-scale current density

Runze Wang<sup>a</sup>, Yanmei Ren<sup>a</sup>, He Wen<sup>a</sup>, Zhengjun Chen<sup>b,\*</sup>, and Ping Wang<sup>a,\*</sup>

<sup>a</sup> School of Materials Science and Engineering, South China University of Technology, Guangzhou 510641, P.R. China.

<sup>b</sup> Guangxi Key Laboratory of Electrochemical Energy Materials, School of Chemistry and Chemical Engineering, Guangxi University, Nanning 530004, P.R. China.

### Corresponding Authors

\*E-mail addresses: mspwang@scut.edu.cn; zjchen@gxu.edu.cn

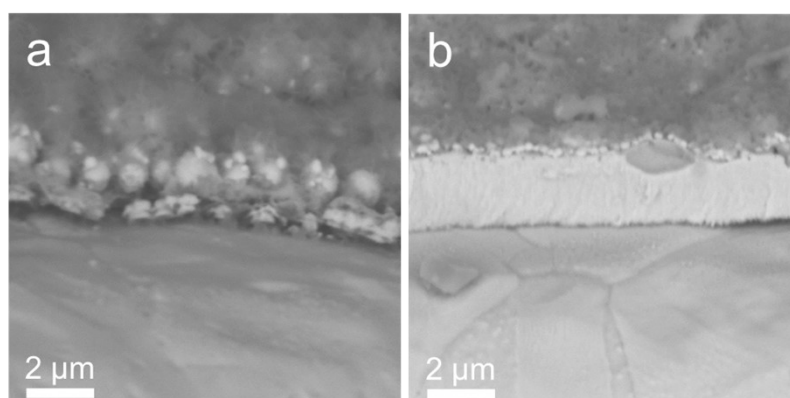

**Figure S1.** Cross-section catalyst layer SEM images of (a) the sample with CNT and (b) the sample without CNT.

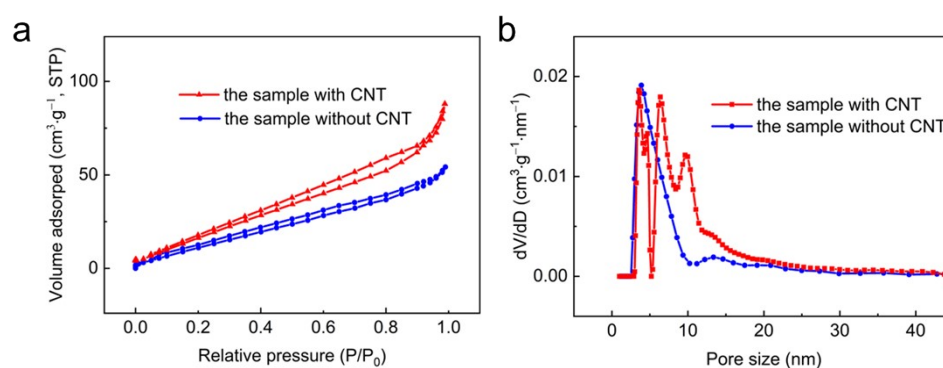

**Figure S2.** (a) N<sub>2</sub> adsorption-desorption isotherms and (b) the corresponding pore size distributions of the sample with CNT and the sample without CNT.

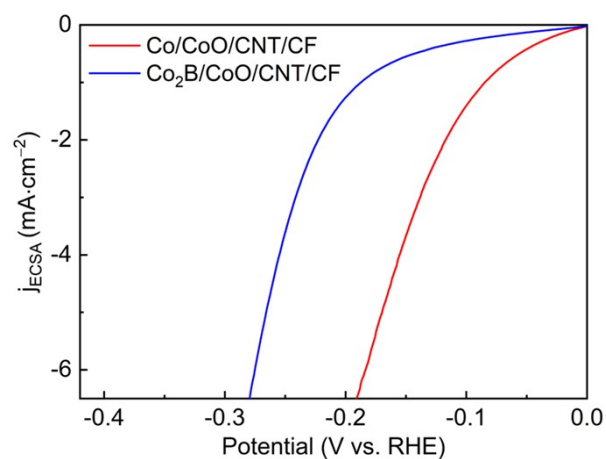

**Figure S3.** ECSA-normalized LSVs of Co/CoO/CNT/CF and Co<sub>2</sub>B/CoO/CNT/CF.

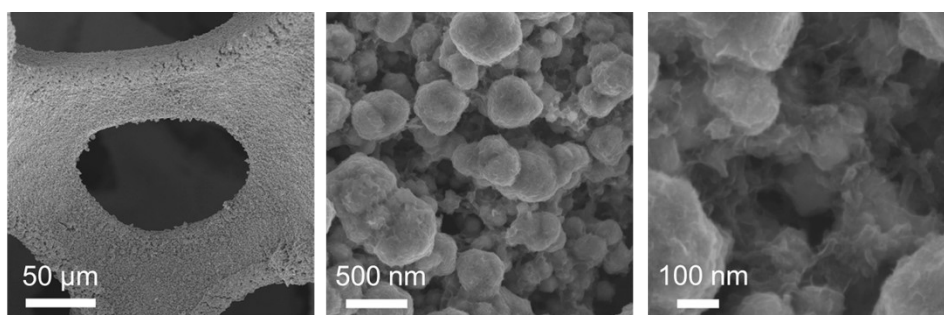

**Figure S4.** SEM images of the post-used Co/CoO/CNT/CF after 100-hour constant-current test at 1000 mA·cm<sup>-2</sup>.

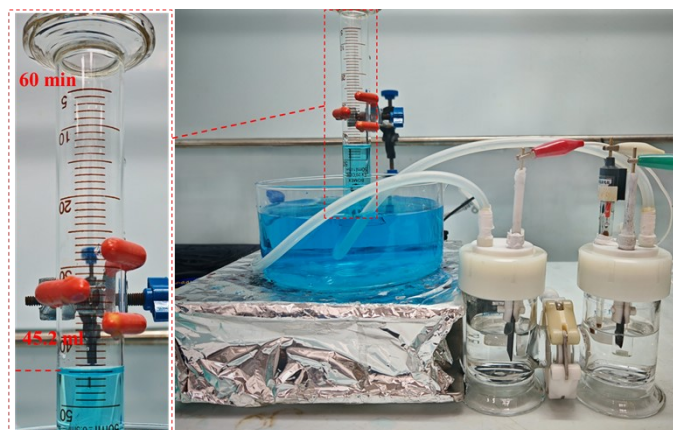

**Figure S5.** Photograph of the gas collection device used in FE test.

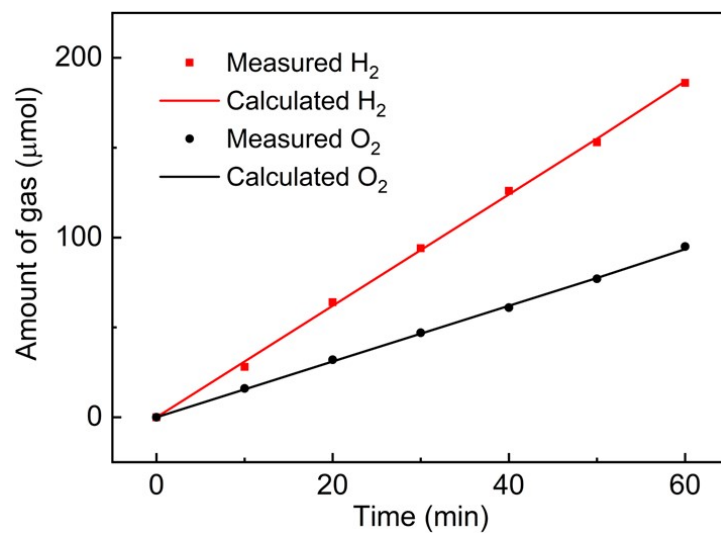

**Figure S6.** The measured H<sub>2</sub> and O<sub>2</sub> amounts *versus* the theoretical yields calculated from the Faraday's law at 10 mA·cm<sup>-2</sup>.

**Table S1.** A comparison of the alkaline HER performance of representative non-precious metal catalysts in a 1.0 M aqueous KOH electrolyte.

| Electrocatalyst                                                          | Overpotential (mV)@   |                        |                        | Reference |
|--------------------------------------------------------------------------|-----------------------|------------------------|------------------------|-----------|
|                                                                          | 10 mA/cm <sup>2</sup> | 100 mA/cm <sup>2</sup> | 500 mA/cm <sup>2</sup> |           |
| Co <sub>2</sub> N/CoN/Co <sub>2</sub> Mo <sub>3</sub> O <sub>8</sub> /CF | 25                    | 93                     | –                      | 1         |
| Ni <sub>4</sub> Mo/NF                                                    | 35                    | 136                    | –                      | 2         |
| Co/Co <sub>2</sub> Mo <sub>3</sub> O <sub>8</sub> /NF                    | 25                    | 113                    | –                      | 3         |
| Co-B-P/NF                                                                | 42                    | 88                     | –                      | 4         |
| FeNiP/MoO <sub>x</sub> /NiMoO <sub>4</sub> /NF                           | –                     | 97                     | –                      | 5         |
| Cu-FeOOH/Fe <sub>3</sub> O <sub>4</sub>                                  | –                     | 129                    | 285                    | 6         |
| Ni <sub>x</sub> -Fe <sub>3</sub> N@NCPs                                  | 38                    | 125                    | 274                    | 7         |
| Ni(OH) <sub>x</sub> /Ni <sub>3</sub> S <sub>2</sub> /NF                  | 54                    | 126                    | 193                    | 8         |
| Co-B@CoO/Ti                                                              | 61                    | –                      | –                      | 9         |
| Co@CoO/NF                                                                | 76                    | –                      | –                      | 10        |
| Co/Co <sub>3</sub> O <sub>4</sub> /NF                                    | 90                    | –                      | –                      | 11        |
| MoS <sub>2</sub> /Mo <sub>2</sub> C/Ti                                   | –                     | –                      | 191                    | 12        |
| Mo <sub>2</sub> C/MoC/CNT                                                | 82                    | –                      | 201                    | 13        |
| Co/CoO/CNT/CF                                                            | 17                    | 86                     | 185                    | This work |

## References

1. W. Hu, Q. Shi, Z. Chen, H. Yin, H. Zhong and P. Wang, Co<sub>2</sub>N/Co<sub>2</sub>Mo<sub>3</sub>O<sub>8</sub> Heterostructure as a highly active electrocatalyst for an alkaline hydrogen evolution reaction, *ACS Appl. Mater. Interfaces*, 2021, **13**, 8337-8343.
2. Q. Zhang, P. Li, D. Zhou, Z. Chang, Y. Kuang and X. Sun, Superaerophobic ultrathin Ni–Mo alloy nanosheet array from in situ topotactic reduction for hydrogen evolution reaction, *Small*, 2017, **13**, 1701648.
3. M. Zang, N. Xu, G. Cao, Z. Chen, J. Cui, L. Gan, H. Dai, X. Yang and P. Wang, Cobalt molybdenum oxide derived high-performance electrocatalyst for the hydrogen evolution reaction, *ACS Catal.*, 2018, **8**, 5062-5069.
4. H. Sun, X. Xu, Z. Yan, X. Chen, L. Jiao, F. Cheng and J. Chen, Superhydrophilic amorphous Co–B–P nanosheet electrocatalysts with Pt-like activity and durability for the hydrogen evolution reaction, *J. Mater. Chem. A*, 2018, **6**, 22062-22069.
5. Z. Xiao, M. Yang, J. Wang, Z. Xu, S. Zhang, A. Tang, R. Gao and H. Yang, FeNiP/MoO<sub>x</sub> integrated electrode grown on monocrystalline NiMoO<sub>4</sub> nanorods with multi-interface for accelerating alkaline hydrogen evolution reaction, *Appl. Catal. B-Environ. Energy*, 2022, **303**, 120913.
6. J. Wang, A. Yang, J. Li, K. Su, Y. Tang and X. Qiu, Top-down and facet-selective phase-segregation to construct concave nanocages with strongly coupled hetero-interface for oxygen evolution reaction, *Appl. Catal. B-Environ. Energy*, 2022, **300**, 120727.
7. G. Wang, W. Tang, Y. Chen, P. Ji, M. Lu, H. Wei, L. Cui, X. Chen and G. Wang, The Ni heteroatom-induced electronic structure tailoring of ultrastable Fe<sub>3</sub>N@NCPs nanosheets electrocatalyst for boosting alkaline seawater electrolysis, *Adv. Funct. Mater.*, 2024, **34**, 2404470.
8. W. He, R. Zhang, D. Cao, Y. Li, J. Zhang, Q. Hao, H. Liu, J. Zhao and H. L. Xin, Superhydrophilic microporous Ni(OH)<sub>x</sub>/Ni<sub>3</sub>S<sub>2</sub> heterostructure electrocatalyst for large-current-density hydrogen evolution, *Small*, 2023, **19**, 2205719.
9. W. Lu, T. Liu, L. Xie, C. Tang, D. Liu, S. Hao, F. Qu, G. Du, Y. Ma, A. M. Asiri and X. Sun, In situ derived Co-B Nanoarray: a high-efficiency and durable 3D bifunctional electrocatalyst for overall alkaline water splitting, *Small*, 2017, **13**, 1700805.
10. C. Wang, Y. Li, C. Gu, L. Zhang, X. Wang and J. Tu, Active Co@CoO core/shell nanowire arrays as efficient electrocatalysts for hydrogen evolution reaction, *Chem. Eng. J.*, 2022, **429**, 132226.
11. X. Yan, L. Tian, M. He and X. Chen, Three-dimensional crystalline/amorphous Co/Co<sub>3</sub>O<sub>4</sub> core/shell nanosheets as efficient electrocatalysts for the hydrogen evolution reaction, *Nano Lett.*, 2015, **15**, 6015-6021.
12. Y. Luo, L. Tang, U. Khan, Q. Yu, H.-M. Cheng, X. Zou and B. Liu, Morphology and surface chemistry engineering toward pH-universal catalysts for hydrogen evolution at high current density, *Nat. Commun.*, 2019, **10**, 269.
13. C. Li, Z. Wang, M. Liu, E. Wang, B. Wang, L. Xu, K. Jiang, S. Fan, Y. Sun, J. Li and K. Liu, Ultrafast self-heating synthesis of robust heterogeneous nanocarbides for high current density hydrogen evolution reaction, *Nat. Commun.*, 2022, **13**, 3338.
